# Supplementary material for: Expression of a Malassezia codon optimized mCherry fluorescent protein in a bicistronic vector
Source: bioRxiv or medRxiv preprint supplement (doi:10.1101/2020.04.16.044297), 2020-06-01
Supplement: Supplementary file [file media-1.pdf]

## Expression of a *Malassezia* codon optimized mCherry fluorescent protein in a bicistronic vector

### Supplementary material

| Amino Acid | Codon | Frequency % | Amino Acid | Codon | Frequency % |
|------------|-------|-------------|------------|-------|-------------|
| *          | TAA   | 29.39       | M          | ATG   | 100.00      |
|            | TAG   | 56.46       | N          | AAC   | 59.38       |
|            | TGA   | 14.16       |            | AAT   | 40.62       |
| A          | GCA   | 16.00       | P          | CCA   | 15.36       |
|            | GCC   | 27.63       |            | CCC   | 26.30       |
|            | GCG   | 40.98       |            | CCG   | 36.54       |
|            | GCT   | 15.39       |            | CCT   | 21.79       |
| C          | TGC   | 64.41       | Q          | CAA   | 26.10       |
|            | TGT   | 35.59       |            | CAG   | 73.90       |
| D          | GAC   | 61.90       | R          | AGA   | 2.31        |
|            | GAT   | 38.10       |            | AGG   | 3.38        |
| E          | GAA   | 28.24       |            | CGA   | 8.60        |
|            | GAG   | 71.76       |            | CGC   | 50.29       |
| F          | TTC   | 52.82       |            | CGG   | 15.97       |
|            | TTT   | 47.18       |            | CGT   | 19.44       |
| G          | GGA   | 11.61       | S          | AGC   | 21.37       |
|            | GGC   | 51.64       |            | AGT   | 11.16       |
|            | GGG   | 13.02       |            | TCA   | 9.77        |
|            | GGT   | 23.74       |            | TCC   | 12.96       |
| H          | CAC   | 59.96       |            | TCG   | 31.64       |
|            | CAT   | 40.04       |            | TCT   | 13.10       |
| I          | ATA   | 7.97        | T          | ACA   | 19.53       |
|            | ATC   | 50.54       |            | ACC   | 22.05       |
|            | ATT   | 41.49       |            | ACG   | 44.98       |
| K          | AAA   | 25.79       |            | ACT   | 13.44       |
|            | AAG   | 74.21       | V          | GTA   | 9.63        |
| L          | CTA   | 7.22        |            | GTC   | 27.61       |
|            | CTC   | 28.18       |            | GTG   | 50.99       |
|            | CTG   | 35.85       |            | GTT   | 11.76       |
|            | CTT   | 13.57       | W          | TGG   | 100.00      |
|            | TTA   | 3.09        |            | Y     | TAC         |
|            | TTG   | 12.10       | TAT        |       | 35.41       |

**Supplementary Table 1.** Relative synonymous codon usage in *Malassezia sympodialis*.

## mCherry

ATGGTGTCGAAGGGCGAGGAAGACAACATGGCGATCATTAAAGGAGTTCATGCGCTTTA  
AGGTGCACATGGAGGGCTCGGTGAACGGCCACGAGTTCGAGATTGAGGGCGAGGGC  
GAGGGCCGCCCTTACGAGGGCACGCAGACGGCGAAGCTCAAGGTGACGAAGGGCG  
GCCCCCTGCCCTTTGCGTGGGACATCCTCTCGCCGACGTTTATGTACGGCTCGAAGG  
CGTACGTGAAGCACCCGGCGGACATTCCGGACTACCTGAAGCTCTCGTTCGGGAGG  
GCTTTAAGTGGGAGCGCGTGATGAACTTTGAGGACGGCGGCGTGGTGACGGTGACG  
CAGGACTCGTCGCTGCAGGACGGCGAGTTCATCTACAAGGTGAAGCTGCGCGGCAC  
GAACTTCCCTCGGACGGCCCCGGTGATGCAGAAGAAGACGATGGGCTGGGAGGCGT  
CGTCGGAGCGCATGTACCCCGAGGACGGCGCGCTGAAGGGCGAGATTAAGCAGCGC  
CTGAAGCTCAAGGACGGTGGCCACTACGACGCGGAGGTGAAGACGACGTACAAGGC  
GAAGAAGCCCGTGCAGCTGCCCGGCGCGTACAACGTGAACATCAAGCTCGACATTAC  
GTCGCACAACGAGGACTACACGATTGTGGAGCAGTACGAGCGCGCGGAGGGCCCGC  
ACTCGACGGGCGGCATGGACGAGCTCTACAAG

MVSKGEEDNMAIIKEFMRFKVHMEGSVNGHEFEIEGEGEGRPYEGTQTAKLKVTKGGPL  
PFAWDILSPQFMYGSKAYVKHPADIPDYLLKLSFPEGFKWERVMNFEDGGVVTVDSSLQ  
DGEFIYKVKLRGTFNPSDGPVMQKKTMGWEASSERMYPEDGALKGEIKQRLKLDGGHY  
DAEVKTTYKAKKPVLPGAYNVNIKLDITSHNEDYTIVEQYERAEGRHSTGGMDELYK

## P2A

GGCTCGGGCGCGACGAACTTCTCGCTCCTCAAGCAGGCGGGCGACGTGGAGGAGAACCCGGGCCCCG

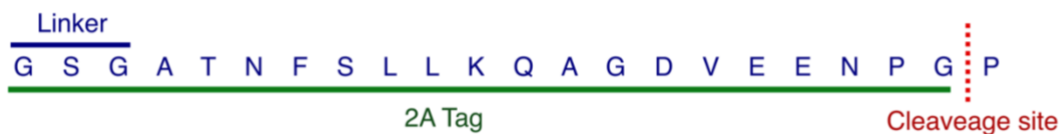

**Supplementary Figure 1.** Codon optimised DNA and protein sequence of mCherry fluorescent protein and porcine teschovirus-1 2A (P2A) pseudo-autolytic peptide.

*Malassezia furfur* CBS 14141 Chromosome 2, putative CDC25 Phosphatase (143 aa)

---

MSFSPPYQYMDADTLASELRRRTQAPNSIAVVDVRDDDYEGGHIVGAIHAPSGTFL  
TRVDSL VGKELQDYERVVFHCSLSQQRGPKSARIYRETRDAAQAAGRVPPTKEQAI  
FVLRDGF AHFGPKFKNERDLVEDWDEEAWEWR\*

*Malassezia furfur* CBS 14141 Chromosome 2, hypothetical Adiponectin Protein Receptor  
(632 aa)

---

MGSDVTPSESGSGVSTPPRVSCPSTPNHVHYTPVTAAALAALSDSIEGGPALRASQS  
SRPPSISDHSEGTHTAAHSAVD AFSLPYWLA YLRSEAA RHAHDIDQRMHAILESPD  
SNDNVLKASISMMTHQLDVVYHALGNLSQRLPMGPSALYDSLPSQSDL SHKLQTL  
MKDWEQHAHLPHSPLFPQTGPLSFGSLGWNASMEQDATASVPAWSYSSPFG LIPG  
DWASMVHMP SREQVSDEVHRR LHAFVEQMHSMPARLSQAALPTSLAAWEAPAS  
ELLHRVEEKL GEMSEQGRAGASHLVQRANQAVHDVEDVLYQAACELAREGRVLI  
SYQSLPTLWRNND CIHTGYRFIPVRNWTLLGSIFQIHNETGNIH THLSGLILVGALF  
WFSGSLDSL TTTTDRWIQTLYLLAAAKCLVCSVSWHVMAGCADLNWFQCFACID  
YTGISWLVAASLLTLVYNGFYCQPNLAIYSVGVFLLGTTMGVLPWYPWFDDPKN  
RTLRLSLFVIMALVGLVPFTHGMYLHGFQHMVYFFSPIPSIASYIAGVVVYALRFPE  
KYWPGRFDLLG HSHQMWHIAIVLAIALHYRAILLFHKDRFTYSQVDGTCPSFADSL  
PWSNAAVGGW WPQAGKALGAL\*

**Supplementary Table 2.** Protein sequences of hypothetical genes located both upstream and downstream of the random mutagenesis insertion point in *mf::mc-27* strain.
